# Supplementary material for: Transcriptional and Metabolic Response of a Strain of Escherichia coli PTS− to a Perturbation of the Energetic Level by Modification of [ATP]/[ADP] Ratio
Source: MDPI journal article supplement (doi:10.3390/biotech13020010), 2024-04-10
Supplement: s1 [file s1]

# Supplementary Materials: Transcriptional and Metabolic Response of a Strain of *Escherichia coli* PTS<sup>-</sup> to a Perturbation of the Energetic Level by Modification of [ATP]/[ADP] Ratio

Table S1. Primer sets used for RT-qPCR assays.

| Pathway, group of genes or cellular process | Primer name <sup>1</sup> | Sequence                     |
|---------------------------------------------|--------------------------|------------------------------|
| <b>ATP synthase</b>                         |                          |                              |
| <i>atpA</i>                                 | <i>atpAa</i>             | 5' TGCACCAATCGACGGTAAAG 3'   |
|                                             | <i>atpAb</i>             | 5' TGCACCAATCGACGGTAAAG 3'   |
| <i>atpD</i>                                 | <i>atpDa</i>             | 5' GACCTCGAACACCCGATTGA 3'   |
|                                             | <i>atpDb</i>             | 5' TCACCGATCTCGCCTTTCAT 3'   |
| <i>atpG</i>                                 | <i>atpGa</i>             | 5' ATGCGCAAAGTGATTGGTCA 3'   |
|                                             | <i>atpGb</i>             | 5' GACACCACCAGGTAGCCAC 3'    |
| <i>atpI</i>                                 | <i>atpIa</i>             | 5' CCTGGACATTTCGATTGG 3'     |
|                                             | <i>atpIb</i>             | 5' GATCAGCGGCAAGAATACCG 3'   |
| <b>Glucose transport</b>                    |                          |                              |
| <i>ompF</i>                                 | <i>ompFa</i>             | 5' TTCGCGGGTCTTAAATACGC 3'   |
|                                             | <i>ompFb</i>             | 5' AATTCTGGCAGCATATCGGTG 3'  |
| <i>galP</i>                                 | <i>galPa</i>             | 5' CATGTATTACGCGCCGAAAA 3'   |
|                                             | <i>galPb</i>             | 5' TGGCAAGTACGTTGGTCAGG 3'   |
| <i>ptsH</i>                                 | <i>ptsHa</i>             | 5' TGA CT TCCAACGGCAAAAGC 3' |
|                                             | <i>ptshb</i>             | 5' TTCGCCTTCTGCGGAGATAG 3'   |
| <i>ptsG</i>                                 | <i>ptsGa</i>             | 5' AAAAGCGACAGGTACCAGCG 3'   |
|                                             | <i>ptsGb</i>             | 5' CGCGCAGACGGGTAATACAT 3'   |
| <b>Acetate transport</b>                    |                          |                              |
| <i>actP (yjcG)</i>                          | <i>actPa</i>             | 5' ATCACTGGCTTCCAGAACGG 3'   |
|                                             | <i>actPb</i>             | 5' CCGTCATAGCCGGAGGTAAAC 3'  |
| <b>Glycolysis and gluconeogenesis</b>       |                          |                              |
| <i>glk</i>                                  | <i>glka</i>              | 5' GAAGCGGTCATTTCGCGTTTA 3'  |
|                                             | <i>glkb</i>              | 5' GAAGCGGTCATTTCGCGTTTA 3'  |
| <i>pgi</i>                                  | <i>pgia</i>              | 5' ACTAACGGTCAGCACGCGTT 3'   |
|                                             | <i>pgib</i>              | 5' TCAGAGAGCGGGTTATGGGT 3'   |
| <i>pgk</i>                                  | <i>pgka</i>              | 5' TGGACAGGGTTTCGTCGTCT 3'   |
|                                             | <i>pgkb</i>              | 5' AGATTACCTCGACGGCGTTG 3'   |
| <i>fbaA</i>                                 | <i>fbaAa</i>             | 5' GGAAATCGAACTGGGTTGCA 3'   |
|                                             | <i>fbaAb</i>             | 5' CGTAATCAACGTCTTCCGGC 3'   |
| <i>fbaB</i>                                 | <i>fbaBa</i>             | 5' GTACAACACCGGGCGTCTG 3'    |
|                                             | <i>fbaBb</i>             | 5' GCGGGTTAGCAGCAAATGAA 3'   |
| <i>fbp</i>                                  | <i>fbpAa</i>             | 5' AAACAGGTTGCGGCAGGTTA 3'   |
|                                             | <i>fbpAb</i>             | 5' CCGAGCGAAGGATCGTAAGT 3'   |

|             |       |                            |
|-------------|-------|----------------------------|
| <i>gapA</i> | gapAa | 5' GGCTCCGCTGGCTAAAGTTA 3' |
|             | gapAb | 5' GGCCATCAACGGTTTTCTGA 3' |
| <i>eno</i>  | enoa  | 5' GTTTCGTCGGTATGGCAGCT 3' |
|             | enob  | 5' GCCTTTACCCAGGAAACGG 3'  |
| <i>gpmA</i> | gpmAa | 5' AGGCGTAAGCGAAGCAAAAG 3' |
|             | gpmAb | 5' GGGTATGGATAGCGCGTTTC 3' |
| <i>gpmB</i> | gpmBa | 5'-GGTATTGCACTGGGATGCCT-3' |
|             | gpmBb | 5'TAATCCACGCGCGAAATAGA 3'  |
| <i>pykA</i> | pykAa | 5' CGTTACCACGTTAGGCCAG 3'  |
|             | pykAb | 5' GCGAGCCGTGAGAAAAGTTC 3' |
| <i>pfkA</i> | pfkAa | 5' CCATGTAGGAACCGTCACCG 3' |
|             | pfkAb | 5' GTTGGCGGATGAAAATGTCC 3' |
| <i>ppc</i>  | ppca  | 5'CAGAAATCACCGTCAGCAGC 3'  |
|             | ppcb  | 5' CATAATGCGACGCCAGCTCT 3' |
| <i>tpiA</i> | tpiA  | 5' AACTCCGGCTCAGGCACAG 3'  |
|             | tpiAb | 5' AGCCGCCGTACTGAATGATC 3' |

---

#### Pentose phosphate pathway

---

|             |       |                             |
|-------------|-------|-----------------------------|
| <i>eda</i>  | edaa  | 5' ATCCGTGCTATCGCCAAAGA 3'  |
|             | edab  | 5' AACTGTGCACCCGCTTCAGT 3'  |
| <i>gnd</i>  | gnda  | 5' GATCGGCGTAGTCGGTATGG 3'  |
|             | gndb  | 5' TCTTCTCACGGGAACGGTTG 3'  |
| <i>rpiA</i> | rpiAa | 5' GATGGGCGGCACTTCAGTAT 3'  |
|             | rpiAb | 5' GCCTTTCATTGTACCGAGCG 3'  |
| <i>rpiB</i> | rpiBa | 5' GAGAGGTTGATGGCGGGATT 3'  |
|             | rpiBb | 5' AGGTTCGCTACAGACGACCG 3'  |
| <i>talA</i> | talAa | 5' CTCAAAATCGTACCCGGTCG 3'  |
|             | talAb | 5' TACAAGTCCACCAGATGGCG 3'  |
| <i>talB</i> | talBa | 5' ACCGTAGTGGCCGACACTG 3'   |
|             | talBb | 5' GGAATCTGCGCTGCGTTAAG 3'  |
| <i>tktB</i> | tktBa | 5' CCCGAAAAGACCTTGCCAAAT 3' |
|             | tktBb | 5' AATATCAGCCATGCCCATCG 3'  |
| <i>edd</i>  | edda  | 5' GTACCGCTGATGGCACGTCT 3'  |
|             | eddb  | 5' GCTTTGAGCAGTTCACGCAC 3'  |
| <i>zwf</i>  | zwfa  | 5' GCACGCGTAGTCATGGAGAA 3'  |
|             | zwfb  | 5' CGGTAAACCTGGCACTCCTC 3'  |

---

#### TCA and glyoxylate shunt

---

|             |       |                             |
|-------------|-------|-----------------------------|
| <i>aceB</i> | aceBa | 5' GAACTGGCTTTCACAAGGCC 3'  |
|             | aceBb | 5' TGTGGCGTAAAATGCGTCAC 3'  |
| <i>aceA</i> | aceAa | 5' ACATGGGCGGCAAAGTTTTA 3'  |
|             | aceAb | 5' AACCAGCAGGGTTGGAACG 3'   |
| <i>aceK</i> | aceKa | 5' GCGTTATCAGCGACCTACCG 3'  |
|             | acekb | 5' GTTGTCTGTCCCCAGCGTTT 3'  |
| <i>aceE</i> | aceEa | 5' CGTGAAGAAGGTGTTGAGCG 3'  |
|             | aceEb | 5' TTGCTGATACCTGTGCCTGC 3'  |
| <i>aceF</i> | aceFa | 5' GTCGTATCCTGCGCGAAGAC 3'  |
|             | aceFb | 5' CAGCATGCCAGGGATAACCAC 3' |
| <i>acnB</i> | acnBa | 5' CCTGGTGTGTTGGTCCGAT 3'   |
|             | acnBb | 5' TTACGCGAAGAACCCGTACC 3'  |

|             |              |                              |
|-------------|--------------|------------------------------|
| <i>fumA</i> | <i>fumAa</i> | 5' ATGTCGATCAACTGCAAGCG 3'   |
|             | <i>fumAb</i> | 5' GAAGCCGCCGTGTTTTTTAC 3'   |
| <i>fumC</i> | <i>fumCa</i> | 5' CCCTAACGACGACGTGAACA 3'   |
|             | <i>fumCb</i> | 5' GAGGAATGAGTTGCTTGCGC 3'   |
| <i>fumB</i> | <i>fumBa</i> | 5' GTACCCTCGGTACTGCAGCC 3'   |
|             | <i>fumBb</i> | 5' AGCGCTTGCTAACTTGACGG 3'   |
| <i>glcB</i> | <i>glcBa</i> | 5' CTCCAGCACAGTTTGTCTGGTT 3' |
|             | <i>glcBb</i> | 5' ATTGGCATCGATTTGCAGCT 3'   |
| <i>icdA</i> | <i>icdAa</i> | 5' GACCGAAGCGGCTGACTTAA 3'   |
|             | <i>icdAb</i> | 5' GCAGTTTAGCGCCATCCATC 3'   |
| <i>lpd</i>  | <i>lpdA</i>  | 5' GGTGGTGCGATTGTCTGGTAC 3'  |
|             | <i>lpdB</i>  | 5' TGGATGGTCAGTGCAGTGTC 3'   |
| <i>mdh</i>  | <i>mdhA</i>  | 5' CGGGTCTGCAACCCTGTCTA 3'   |
|             | <i>mdhB</i>  | 5' CGTAGGCACATTCGACAACG 3'   |
| <i>sdhC</i> | <i>sdhCa</i> | 5' TGGCGTATCACGTCGTCGA 3'    |
|             | <i>sdhCb</i> | 5' AAAGGAGATTTTGGCGGAGC 3'   |
| <i>sdhB</i> | <i>sdhBa</i> | 5' TGAACGGCAAGAATGGTCTG 3'   |
|             | <i>sdhBb</i> | 5' GATCACCGGTAAACCTGGCA 3'   |
| <i>sucA</i> | <i>sucAa</i> | 5' GCGGCAAAGAAACCATGAAA 3'   |
|             | <i>sucAb</i> | 5' TTCGGTGCTGGTAATGTGCA 3'   |
| <i>sucB</i> | <i>sucBa</i> | 5' GCAGTACGGTGAAGCGTTTG 3'   |
|             | <i>sucBb</i> | 5' CTTCCGGGTAACGTTTCAGG 3'   |
| <i>sucC</i> | <i>sucCa</i> | 5' CCAAAATCTTCATGGGCCTG 3'   |
|             | <i>sucCb</i> | 5' GCAAATCAGATCGCCCTGTT 3'   |

#### **Anaplerotic genes**

|             |              |                             |
|-------------|--------------|-----------------------------|
| <i>pckA</i> | <i>pckAa</i> | 5' ACATGTTTATTCGCCCGAGC 3'  |
|             | <i>pckAb</i> | 5' CTGTTCTTTCCACTGCGGGT 3'  |
| <i>maeB</i> | <i>maeBa</i> | 5' TGGTTTGCGATTCAAAAGGC 3'  |
|             | <i>maeBb</i> | 5' GAGGGTACGTTTGCCGTCAT 3'  |
| <i>maeA</i> | <i>maeAa</i> | 5' TGGTTTGCGATTCAAAAGGC 3'  |
|             | <i>maeAb</i> | 5' GAGGGTACGTTTGCCGTCAT 3'  |
| <i>ppsA</i> | <i>ppsAa</i> | 5' TCAGCAGGAAACCTTCCTCAA 3' |
|             | <i>ppsAb</i> | 5' GATAAGAGATGGCGCGATCG 3'  |

#### **Respiratory chain**

|             |              |                             |
|-------------|--------------|-----------------------------|
| <i>cyoD</i> | <i>cyoDa</i> | 5' CCTGGCAATGGCAGTGGTAC 3'  |
|             | <i>cyoDb</i> | 5' TGAAGACAAACGCCGTCATG 3'  |
| <i>cyoE</i> | <i>cyoEa</i> | 5' GTGATCGGCTACTGTGCGGT 3'  |
|             | <i>cyoEb</i> | 5' GCGATGGCATAGGAGTGAGG 3'  |
| <i>frdB</i> | <i>frdBa</i> | 5' TTGAGGTGGTGCGCTATAACC 3' |
|             | <i>frdBb</i> | 5' GCCCAGCGCATCCAGTAAT 3'   |
| <i>frdD</i> | <i>frdDa</i> | 5' TGGTCGCGTATTCCTGTTCC 3'  |
|             | <i>frdDb</i> | 5' CCGCAGGTACGTGGATTTTC 3'  |
| <i>napA</i> | <i>napAa</i> | 5' GATGGGCTGCTATGACGACA 3'  |
|             | <i>napAb</i> | 5' GGTTAGTGATGCGCGACCA 3'   |
| <i>narG</i> | <i>narGa</i> | 5' CGATTATCCGGCGACTTACG 3'  |
|             | <i>narGb</i> | 5' GCGAGCCGTGAGAAAAGTTC 3'  |
| <i>ndh</i>  | <i>ndhA</i>  | 5' GTCGATCGTAACCACAGCCA 3'  |
|             | <i>ndhB</i>  | 5' GCATGGGCCAGATAGCTCAA 3'  |

|                                                            |              |                               |
|------------------------------------------------------------|--------------|-------------------------------|
| <i>nuoA</i>                                                | <i>nuoAa</i> | 5' CTGGTGGCCATGTTCTTCGT 3'    |
|                                                            | <i>nuoAb</i> | 5' GCTTCCACAAAGCCTACCCA 3'    |
| <i>nuoB</i>                                                | <i>nuoBa</i> | 5' CGTTTTGGCGCAGAAGTATTG 3'   |
|                                                            | <i>nuoBb</i> | 5' AGACGCTGAATAACCGGTGC 3'    |
| <i>nuoF</i>                                                | <i>nuoFa</i> | 5' TATCCGTA CTCCGAAACGC 3'    |
|                                                            | <i>nuoFb</i> | 5' CGCCTTCGTAACCGTTTTTG 3'    |
| <i>nuoM</i>                                                | <i>nuoMa</i> | 5' CGGTAAAACGCGTATCACGG 3'    |
|                                                            | <i>nuoMb</i> | 5' AGTGAACAAAAACCAGCGCC 3'    |
| <i>nuoN</i>                                                | <i>nuoNa</i> | 5' TGTCGCGTTGGGTAAAAACC 3'    |
|                                                            | <i>nuoNb</i> | 5' GAGAGAGTTTGAAGCCGAGGC 3'   |
| <i>ubiE</i>                                                | <i>ubiEa</i> | 5' GGCAGAATCCATCCGTATGC 3'    |
|                                                            | <i>ubiEb</i> | 5' CCCCTGCCGTCAGATTGTAG 3'    |
| <b>Fermentation and acetate production and utilization</b> |              |                               |
| <i>ackA</i>                                                | <i>ackAa</i> | 5' CTGGTTCTGAACTGCGGTAGTTC 3' |
|                                                            | <i>ackAb</i> | 5' GGCAGGTGGAACATTCCG 3'      |
| <i>acs</i>                                                 | <i>acsa</i>  | 5' GTGCGTAAAGAGATTGGCCC 3'    |
|                                                            | <i>acsb</i>  | 5' CGCAGAATACGGCGCATAAT 3'    |
| <i>ldhA</i>                                                | <i>ldhAa</i> | 5' GGCGTGATGATCGTCAATACC 3'   |
|                                                            | <i>ldhAb</i> | 5' ACGTCCATACCCAACGAACC 3'    |
| <i>pflD</i>                                                | <i>pflDa</i> | 5' AAAGTCCGCGCTCGCTTAAT 3'    |
|                                                            | <i>pflDb</i> | 5' TCTTTGCAGTAGTGCGCAA 3'     |
| <i>pflB</i>                                                | <i>pflBa</i> | 5' AAGGTTCTTGCAAAGCGTACA 3'   |
|                                                            | <i>pflBb</i> | 5' GTAAACGTCTGAACACGCCCT 3'   |
| <i>poxB</i>                                                | <i>poxBa</i> | 5' AAAGTCCGCGCTCGCTTAAT 3'    |
|                                                            | <i>poxBb</i> | 5' TCTTTGCAGTAGTGCGCAA 3'     |
| <b>Sigma factors</b>                                       |              |                               |
| <i>rpoA</i>                                                | <i>rpoAa</i> | 5' TCAACCTGAAAGGGCTGGC 3'     |
|                                                            | <i>rpoAb</i> | 5' GGTGATATCGGCTGCAGTCA 3'    |
| <i>rpoC</i>                                                | <i>rpoCa</i> | 5' GGCGTTGAAGTGACCCAGAC 3'    |
|                                                            | <i>rpoCb</i> | 5' GACGGCAGCGATTTTCAGG 3'     |
| <i>rpoD</i>                                                | <i>rpoDa</i> | 5' GATTCTGCGACCACCGAAAG 3'    |
|                                                            | <i>rpoDb</i> | 5' TCGATACCGAAACGCATACG 3'    |
| <i>rpoE</i>                                                | <i>rpoEa</i> | 5' GAACTATTGAGTCCCTCCCGG 3'   |
|                                                            | <i>rpoEb</i> | 5' CGGACAATCCATGATAGCGG 3'    |
| <i>rpoH</i>                                                | <i>rpoHa</i> | 5' CAGTTGGCAACCTGGATTCC 3'    |
|                                                            | <i>rpoHb</i> | 5' GCCATGGTAATGCAGCTTTTC 3'   |
| <i>porN</i>                                                | <i>rpoNa</i> | 5' TGAAACCGATGGTACTGGCC 3'    |
|                                                            | <i>rpoNb</i> | 5' GCCTCGTGGACTATGCAGGT 3'    |
| <i>rpoS</i>                                                | <i>rpoSa</i> | 5' GGACGCGACTCAGCTTTACC 3'    |
|                                                            | <i>rpoSb</i> | 5' CGACATCTCCACGCAGTGC 3'     |
| <i>rpoZ</i>                                                | <i>rpoZa</i> | 5' TGGCACGCGTAACTGTTCA 3'     |
|                                                            | <i>rpoZb</i> | 5' TCCGCCTACCTGCATCTGAC 3'    |
| <b>Regulators</b>                                          |              |                               |
| <i>arcA</i>                                                | <i>arcAa</i> | 5' ATCACCAAACCGTTCAACCC 3'    |
|                                                            | <i>arcAb</i> | 5' ACGCTACGACGTTCTTCGCT 3'    |
| <i>arcB</i>                                                | <i>arcBa</i> | 5' AATCTGACGGCGCAGGATAA 3'    |

|                            |       |                              |
|----------------------------|-------|------------------------------|
|                            | arcBb | 5' TGACCCAGCTGTTGCAGATG 3'   |
| <i>cra</i> ( <i>fruR</i> ) | craa  | 5' TCTTGTGATCCCCGATCTGG 3'   |
|                            | crab  | 5' AGCAGGCAATCAGCAGTTGA 3'   |
| <i>cyaA</i>                | cyaAa | 5' AGCGCCAATTGCTACAACGT 3'   |
|                            | cyaAb | 5' ACGGAAGCGGTTTTTCATCAA 3'  |
| <i>glcC</i>                | glcCa | 5' TCGCCCTATTTGCGAAGTG 3'    |
|                            | glcCb | 5' CACACAGTCGACGTTCCGAG 3'   |
| <i>iclR</i>                | iclRa | 5' CTTTATGGTCGGCAGCAGCT 3'   |
|                            | iclRb | 5' ATTGACCGTTTTCGCCAGACT 3'  |
| <i>ihfA</i>                | ihfAa | 5' GGCGAACAGGTGAAACTCTCTG 3' |
|                            | ihfAb | 5' GTAATGGGAATATCCTCGCCC 3'  |
| <i>fadR</i>                | fadRa | 5' CGCTGGGCTTCTACCACAAA 3'   |
|                            | fadRb | 5' AATCTCGCCACTCTCATGCC 3'   |
| <i>fnr</i>                 | fnra  | 5' CGGAAAAGCGAATTATACGGC 3'  |
|                            | fnrb  | 5' TTCGTTGAGTGTGAACGGGA 3'   |
| <i>narL</i>                | narLa | 5' TGATTGACGATCACCCGATG 3'   |
|                            | narLb | 5' ACCCTGTCGCCATTACTCG 3'    |
| <b>Stress</b>              |       |                              |
| <i>rsd</i>                 | rsda  | 5' TGGCATTAAAGCCTGGCAAAG 3'  |
|                            | rsdb  | 5' TGAAATGTCCGGCAGACAAG 3'   |
| <i>soxR</i>                | soxRa | 5' AACAGCTTTCGTCCCAATGG 3'   |
|                            | soxRb | 5' AAGGCAGCCACAACCAATACA 3'  |
| <i>soxS</i>                | soxSa | 5' CGATTACATTCGCCAACGC 3'    |
|                            | soxSb | 5' GCGAGACATAACCCAGGTCC 3'   |
| <i>spoT</i>                | spoTa | 5' ATCCGATCTCTTCCCGGATG 3'   |
|                            | spoTb | 5' GCACTGCATAAGCGAAGTCG 3'   |
